# Supplementary material for: Pathways to conspiracy: The social and linguistic precursors of involvement in Reddit’s conspiracy theory forum
Source: PubMed Central journal article supplement (PMC6860422; doi:10.1371/journal.pone.0225098), 2019-11-18
Supplement: pone.0225098.s001.pdf [file pone.0225098.s001.pdf]

## **S1 Appendix: Dataset availability and supporting details**

### ***Data Availability***

The reddit comment dataset was collected by Reddit user 'Stuck In The Matrix' using the official Reddit API. The post describing the dataset and its collection is available (as of 4 Nov 2019) at:

[https://www.reddit.com/r/datasets/comments/3bxlg7/i\\_have\\_every\\_publicly\\_available\\_reddit\\_comment/](https://www.reddit.com/r/datasets/comments/3bxlg7/i_have_every_publicly_available_reddit_comment/)

The dataset has been widely used for research purposes, and is available via academic torrents [1,2] at:

<http://academictorrents.com/details/7690f71ea949b868080401c749e878f98de34d3d/tech>

Please note that other versions of the dataset (such as those hosted by pushshift.io) may differ from the archived version used in our paper. Our ethics clearance does not permit hosting more specific intermediate versions of the dataset which might be able to identify particular users. Should academictorrents become unavailable in the future, please contact the authors and we will make reasonable arrangements to transmit the dataset.

[1] Henry Z. Lo. and Cohen, Joseph Paul "Academic Torrents: Scalable Data Distribution." Neural Information Processing Systems Challenges in Machine Learning (CiML) Workshop, 2016, <http://arxiv.org/abs/1603.04395>.

[2] Cohen, Joseph Paul, and Henry Z. Lo. "Academic Torrents: A Community-Maintained Distributed Repository." Annual Conference of the Extreme Science and Engineering Discovery Environment, 2014, <http://doi.org/10.1145/2616498.2616528>.

**Reddit Demographics:**

Demographic information was taken from the 2016 Reddit Demographics survey (the most recent available at the time of writing). A post describing this information can be found at: [https://www.reddit.com/r/dataisbeautiful/comments/5700sj/octhe\\_results\\_of\\_the\\_reddit\\_demographics\\_survey/](https://www.reddit.com/r/dataisbeautiful/comments/5700sj/octhe_results_of_the_reddit_demographics_survey/)

The following demographic information is a description of the graphics associated with the above post, should they become unavailable in the future:

Age:

- 18-25 56.7%
- 26-35 22.7%
- <17 14.4%
- Other 6.2%

Gender:

- Male: 63.1%
- Female: 33.3%
- Other: 3.6%

Ethnicity:

- White: 81.8%
- Other: 18.2%

## Bot Removal:

The list of known bots was downloaded from:

[https://www.reddit.com/r/botwatch/comments/1xojwh/list\\_of\\_320\\_reddit\\_bots/](https://www.reddit.com/r/botwatch/comments/1xojwh/list_of_320_reddit_bots/)

And combined with a list of users whose forum diversity (described in the text) was 15 Standard Deviations above the mean. The list of 466 usernames culled as bots is as follows:

|                      |                      |                      |
|----------------------|----------------------|----------------------|
| A858DE45F56D9BC9     | comment_copier_bot   | frytipbot            |
| AAbot                | compilebot           | fsctipbot            |
| ADHDbot              | CompileBot           | FTFY_Cat             |
| alumbot              | ComplimentingBot     | FTFY_Cat6            |
| allinonebot          | conspirobot          | GabenCoinTipBot      |
| AltCodeBot           | CPTModBot            | gabenerizer-bot      |
| ALTcointip           | cRedditBot           | gabentipbot          |
| annoying_yes_bot     | creepiersmilebot     | GameDealsBot         |
| Antiracism_Bot       | CreepierSmileBot     | Gatherer_bot         |
| ApiContraption       | CreepySmileBot       | GATSBOT              |
| A_random_gif         | cris9696             | GeekWhackBot         |
| asmrspambot          | cruise_bot           | gfy_bot              |
| AssHatBot            | CuteBot6969          | gfycat-bot-sucksdick |
| astro-bot            | d3posterbot          | GiantBombBot         |
| AtheismModBot        | DDBotIndia           | GifAsHTML5           |
| auto-doge            | ddlbot               | gifster_bot          |
| AutoInsult           | define_bot           | givesafuckbot        |
| automoderator        | DefinitelyBot        | gives_you_boobies    |
| autourbanbot         | _Definition_Bot_     | gocougs_bot          |
| autowikibot          | DeltaBot             | godwin_finder        |
| AVR_Modbot           | demobilizer          | golferbot            |
| bad_ball_ban_bot     | dgctipbot            | GoneWildResearcher   |
| BadLinguisticsBot    | Dickish_Bot_Bot      | GooglePlusBot        |
| BanishedBot          | Dictionary_Bot       | GotCrypto            |
| ban_pruner           | DidSomeoneSayBoobs   | gracefulcharitybot   |
| baseball_gif_bot     | digitipbot           | gracefulclaritybot   |
| beecointipbot        | disapprovalbot       | GrammerNazi_         |
| BeetusBot            | DNotesTip            | GreasyBacon          |
| BELITipBot           | DogeLotteryModBot    | gregbot              |
| BensonTheBot         | dogetipbot           | groompbot            |
| Bible_Verses_Bot     | DogeTipStatsBot      | Grumbler_bot         |
| bitcoinpartybot      | DogeWordCloudBot     | gunners_gif_bot      |
| bitcointip           | DotaCastingBot       | GunnersGifsBot       |
| bitofnewsbot         | Downtotes_Plz        | GunnitBot            |
| BlackjackBot         | DownvotesMcGoats     | GWHistoryBot         |
| BlockchainBot        | DRKTipBot            | haiku_robot          |
| bocketybot           | DropBox_Bot          | Handy_Related_Sub    |
| __bot__              | earthtipbot          | havoc_bot            |
| Brigade_Bot          | edmprobot            | HCE_Replacement_Bot  |
| BRMT_Bot             | elMatadero_bot       | hearing_aid_bot      |
| Bronze-Bot           | elwh392              | hearing-aid_bot      |
| c5bot                | EmmaBot              | hearingaid_bot       |
| CAH_BLACK_BOT        | Epic_Face_Bot        | HighResImageFinder   |
| Cakeday-Bot          | EscapistVideoBot     | hit_bot              |
| callfloodbot         | ExmoBot              | hockey_gif_bot       |
| callibot             | expired_link_bot     | HockeyGT_Bot         |
| CalvinBot            | ExplanationBot       | HowIsThisBestOf_Bot  |
| canada_goose_tip_bot | fact_check_bot       | howstat              |
| CaptionBot           | faketipbot           | HScard_display_bot   |
| CarterDugSubLinkBot  | _FallacyBot_         | hwsbot               |
| CasualMetricBot      | fa_mirror            | IAGreeBot            |
| changetip            | FedoraTipAutoBot     | I_BITCOIN_CATS       |
| CHART_BOT            | fedora_tip_bot       | ICouldntCareLessBot  |
| cheesecointipbot     | Fedora-Tip-Bot       | imgurHostBot         |
| Chemistry_Bot        | fedoratips           | imgur_rehosting      |
| ChristianityBot      | FelineFacts          | imgurtranscriber     |
| chromabot            | Fixes_GrammerNazi_   | imirror_bot          |
| classybot            | flappytip            | Insane_Photo_Bot     |
| CLOSING_PARENTHESIS  | flips_title          | I_Say_No_            |
| Codebreakerbreaker   | foreigneducationbot  | IsItDownBot          |
| coinflipbot          | FriendlyCamelCaseBot | IS_IT_SOLVED         |
| coinyetipper         | FriendSafariBot      | isitupbot            |
| colorcodebot         | FrontpageWatch       | jerkbot-3hunna       |
| Comment_Codebreaker  | Frown_Bot            | JiffyBot             |

JotBot  
JumpToBot  
KarmaConspiracy\_Bot  
Kevin\_Garnett\_Bot  
keysteat\_bot  
kittehcointipbot  
KSPortBot  
last\_cakeday\_bot  
LazyLinkerBot  
Link\_Correction\_Bot  
Link\_Demobilizer  
LinkedCommentBot  
linkfixerbot1  
linkfixerbot2  
linkfixerbot3  
LinkFixerBotSnr  
Link\_Rectifier\_Bot  
LocationBot  
loser\_detector\_bot  
luckoftheshibe  
MAGNIFIER\_BOT  
Makes\_Small\_Text\_Bot  
makesTextSmall  
malen-shutup-bot  
malo\_the\_bot  
matthewrobo  
memedad-transcriber  
meme\_transcriber  
Meta\_Bot  
MetatasticBot  
MetricPleaseBot  
Metric\_System\_Bot  
misconception\_fixer  
mma\_gif\_bot  
moderator-bot  
MontrealBot  
MovieGuide  
MultiFunctionBot  
MumeBot  
NASCARThreadBot  
Nazeem\_Bot  
nba\_gif\_bot  
new\_edden\_news\_bot  
New\_Small\_Text\_Bot  
nfl\_gif\_bot  
NFLVideoBot  
nhl\_gif\_bot  
Nidalee\_Bot  
NightMirrorMoon  
NobodyDoesThis  
NoSleepAutoMod  
NoSobStoryBot2  
not\_alot\_bot  
notoverticalvideo  
NotRedditEnough  
NSLbot  
nyantip  
okc\_rating\_bot  
pandatipbot  
pandatips  
PGN-Bot  
PhoenixBot  
PHOTO\_OF\_CAPTAIN\_RON  
PigLatinsYourComment  
PJRP\_Bot  
PlaylisterBot  
PlayStoreLinks\_Bot  
PleaseRespectTables  
PloungeMafiaVoteBot  
PokemonFlairBot  
PoliteBot  
PoliticBot  
PonyTipBot  
PornOverlord  
Porygon-Bot  
potdealer  
PresidentObama\_\_\_\_  
ProselytizerBot  
provides-id  
PunknRollBot  
QUICHE-BOT  
qznc\_bot  
raddit-bot  
randnumbot  
Random-ComplimentBOT  
RandomTriviaBot  
Rangers\_Bot  
rarchives  
Readdit\_Bot  
readsmalltextbot  
Reads\_Small\_Text\_Bot  
RealtchPostBot  
ReddCoinGoldBot  
redditbots  
redditreviewbot  
reddtipbot  
Relevant\_News\_Bot  
relevantxkcd-bot  
request\_bot  
RequirementsBot  
RFootballBot  
RfreebandzBOT  
rhiever-bot  
rightsbot  
RiskyClickBot  
\_Rita\_  
rnfl\_robot  
roger\_bot  
r\_PictureGame  
rSGSpolice  
rss\_feed  
rubycointipbot  
rule\_bot  
rusetipbot  
SakuraiBot  
SakuraiBot\_test  
SatoshiTipBot  
sentimentviewbot  
serendipitybot  
SERIAL\_JOKE\_KILLER  
shadowbanbot  
ShadowBannedBot  
ShibeBot  
ShillForMonsanto  
Shiny-Bot  
ShittyGandhiQuotes  
ShittyImageBot  
SketchNotSkit  
slapbot  
slickwom-bot  
SmallTextReader  
SMCTipBot  
Smile\_Bot  
snapshot\_bot  
soccer\_gif\_bot  
softwareswap\_bot  
Somalia\_Bot  
Some\_Bot  
sports\_gif\_bot  
spursgifs\_xposterbot  
SRD\_Notifier  
SRSScreenshot  
SRS\_History\_Bot  
StackBot  
StarboundBot  
stats-bot  
steam\_bot  
StencilTemplateBOT  
StreetFightMirrorBot  
subtext-bot  
SuchModBot  
SurveyOfRedditBot  
SWTOR\_Helper\_Bot  
synonym\_flash  
tabledresser  
techobot  
tennis\_gif\_bot  
test\_bot0x00  
Text\_Reader\_Bot  
thankyoubot  
TheSwedishBot  
TipMoonBot  
tipmoonbot1  
tipmoonbot2  
tips\_bot  
TitsOrGTFO\_Bot  
tittietipbot  
topcoin\_tip  
TOP\_COMMENT\_OF\_YORE  
topredditbot  
totes\_meta\_bot  
ttumblrbots  
TweetPoster  
Twitch2YouTube  
Unhandy\_Related\_Sub  
unitconvert  
UnobtaniumTipBot  
UrbanDicBot  
UselessArithmeticBot  
UselessConversionBot  
valkyriobot  
versebot  
VerseBot  
vertcoinbot  
vertcointipbot  
VideoLinkBot  
VideopokerBot  
VsauceBot  
WeAppreciateYou  
Website\_Mirror\_Bot  
WeeaBot  
wheres\_the\_karma\_bot  
WhoWouldWinBot  
Wiki\_Bot  
Wiki\_FirstPara\_bot  
WikipediaCitationBot  
Wink-Bot  
wooshbot  
WordCloudBot2  
WritingPromptsBot  
wtf\_content\_bot  
WWE\_Network\_Bot  
X\_BOT  
xkcd\_bot  
xkcdcomic\_bot  
xkcd\_number\_bot  
xkcd\_transcriber  
yes\_it\_is\_weird  
yourebot  
YT\_Bot
